# Supplementary material
Source: PubMed Central journal article supplement (PMC4410356)
Supplement: NIHMS325134-supplement-01.pdf [file NIHMS325134-supplement-01.pdf]

**Appendix A – FAVORIT Ancillary Cognitive Trial Investigators**

| <b>FACT Study Center</b>                                       | <b>Principal Investigator</b>                | <b>Coordinator</b>                                                  |
|----------------------------------------------------------------|----------------------------------------------|---------------------------------------------------------------------|
| Hennepin County Medical Center<br>Medical College of Wisconsin | Bertram Kasiske, MD<br>Barbara Bresnahan, MD | Teresa Anderson-Haag, Pharm.D.<br>Patricia R. Lyman<br>Jesse Pagels |
| London Health Sciences Center                                  | Andrew House, MD, FRCPC                      | Erin McRae, RN<br>Mary Jean Edgar                                   |
| University of Iowa                                             | Lawrence Hunsicker, MD                       | Tammy Lowe<br>Wendy Wallace                                         |
| Duke University                                                | Stephen R. Smith, MD, MHS                    | Judy Coffman<br>Beth Armbruster                                     |
| University of Alabama at Birmingham                            | Clifton E. Kew, II, MD                       | Patsy Jones<br>Angie Kendrach<br>Randal Parks                       |
| Oregon Health Sciences University                              | Douglas Norman, MD                           | Charlie Borzy<br>Jean McCormick                                     |
| Rhode Island Hospital                                          | Andrew Bostom, MD                            | Maria Medeiros<br>Joyce McKenney, MA, MPH                           |
| University of Toronto                                          | Edward Cole, MD, FRCP(C)                     | Jeffrey Blackmore<br>Heather Ford<br>Geetha Sanmugalingham          |
| University of Wisconsin - Madison                              | John Pirsch, MD                              | Aimee K. Sundberg, Pharm.D<br>Jeremy Groth                          |
| Ohio State University                                          | Todd Pesavento, MD                           | Brooke McDaniel<br>Kimberly Mahler                                  |
| University of Maryland                                         | Matthew Weir, MD<br>Stephen Seliger, MD      | Lalitha De Silva Anandagoda                                         |
| Mayo Clinic - Minnesota                                        | Fernando Cosio, MD                           | Misty Berndt                                                        |
| Brigham and Women's Hospital                                   | Ajay Singh, MD                               | Youssef M.K. Farag, MD                                              |
| Maine Medical Center                                           | John Vella, MD, FACP, FRCP                   | Krista Garrison                                                     |
| Southern Illinois University Medical                           | Edward J. Alfrey, MD                         | Lori Miedwig, MA                                                    |

Drexel University Medical.  
Brody School of Medicine at East Carolina University

University of North Carolina - FAVORIT Data  
Coordinating Center, Collaborative Studies  
Coordinating Center  
Washington University  
Universidade Federal de Sao Paulo

M.S. Anil Kumar, MD  
Paul Bolin, Jr., MD

Myra A. Carpenter, PhD

Alvaro Pacheco-Silva, MD  
Silvia Bolognani, PhD

David Pence  
Cynthia Gifford-Hollingsworth  
Karen Parker, RN  
Connie Garris  
Winifred Bryant

Maria Medeiros  
Iria Okano  
Patricia Quintino  
Michele Giordan

- a. Memory score distributions showed possible ceiling effect. See Supporting Information confirming the significance of the association between folate and memory scores using TOBIT and LOGISTIC regressions that take this distribution into account.
- b. Trails scores are logged
- c. \*  $P < 0.05$ , \*\*  $P < 0.01$

**Supplementary Information**

TOBIT Regression: Parameter estimates and associated p-values for Word List Percent Retention and Recognition cognitive tasks. Percent Retention was censored at 100, Word List Recognition was censored at 24.

| Cognitive tests                     | <u>Unadjusted Model</u>            |                    |                      | <u>Model 2</u>                    |                    |                     | <u>Model 3</u>                    |                     |
|-------------------------------------|------------------------------------|--------------------|----------------------|-----------------------------------|--------------------|---------------------|-----------------------------------|---------------------|
| Adjusted for:                       |                                    |                    |                      | Age, Sex and Education            |                    |                     | Age, Sex Education and eGFR       |                     |
|                                     | Ln(Folate)                         | Ln(tHcy)           | eGFR                 | Ln(Folate)                        | Ln (tHcy)          | eGFR                | Ln(Folate)                        | Ln (tHcy)           |
| Word List -<br>Percent<br>Retention | <b>Est=9.30</b><br><b>P=0.019</b>  | Est=2.67<br>P=0.67 | Est=-0.17<br>P=0.088 | <b>Est=9.7</b><br><b>P=0.014</b>  | Est=3.40<br>P=0.58 | Est=-0.12<br>P=0.24 | <b>Est=9.68</b><br><b>P=0.015</b> | Est=-3.42<br>P=0.64 |
| Word List –<br>Recognition          | <b>Est=1.23</b><br><b>p =0.016</b> | Est=0.09<br>p=0.91 | Est=-0.01<br>p=0.30  | <b>Est=1.23</b><br><b>P=0.020</b> | Est=0.21<br>P=0.78 | Est=-0.00<br>P=0.74 | <b>Est=1.31</b><br><b>P=0.016</b> | Est=-0.13<br>P=0.89 |
